# Supplementary material
Source: publisher figshare collection journal article supplement (https://gsapubs.figshare.com/articles/dataset/_/12531095)
Supplement: Supplementary file 1 [file 1]

Figure DR-1. Spider diagram for mafic volcanic rocks from the Channel Islands located off the coast of southern California (Weigand et al (1998).

Figure DR-2. Spider diagram for averages of Neogene felsic volcanic rocks from coastal California based on data from Cole et al (1995, Weigand et al (1998), and Weigand et al (2002). An average pattern for felsic volcanic rocks from southern California (Weigand et al., 1998) and an average pattern for Pinal metasedimentary rocks are also plotted (De Melas, 1983; Copeland, 1986).

Figure DR-3. Spider diagram comparing average pattern for felsic meta-volcanic rocks from the Pinal terrane with average pattern for felsic rocks from the Alaskan terrane (Barker et al., 1992). An average pattern for Pinal metasedimentary rocks is also plotted (De Melas, 1983; Copeland, 1986).

Meijer, Figure DR-1, .xcl

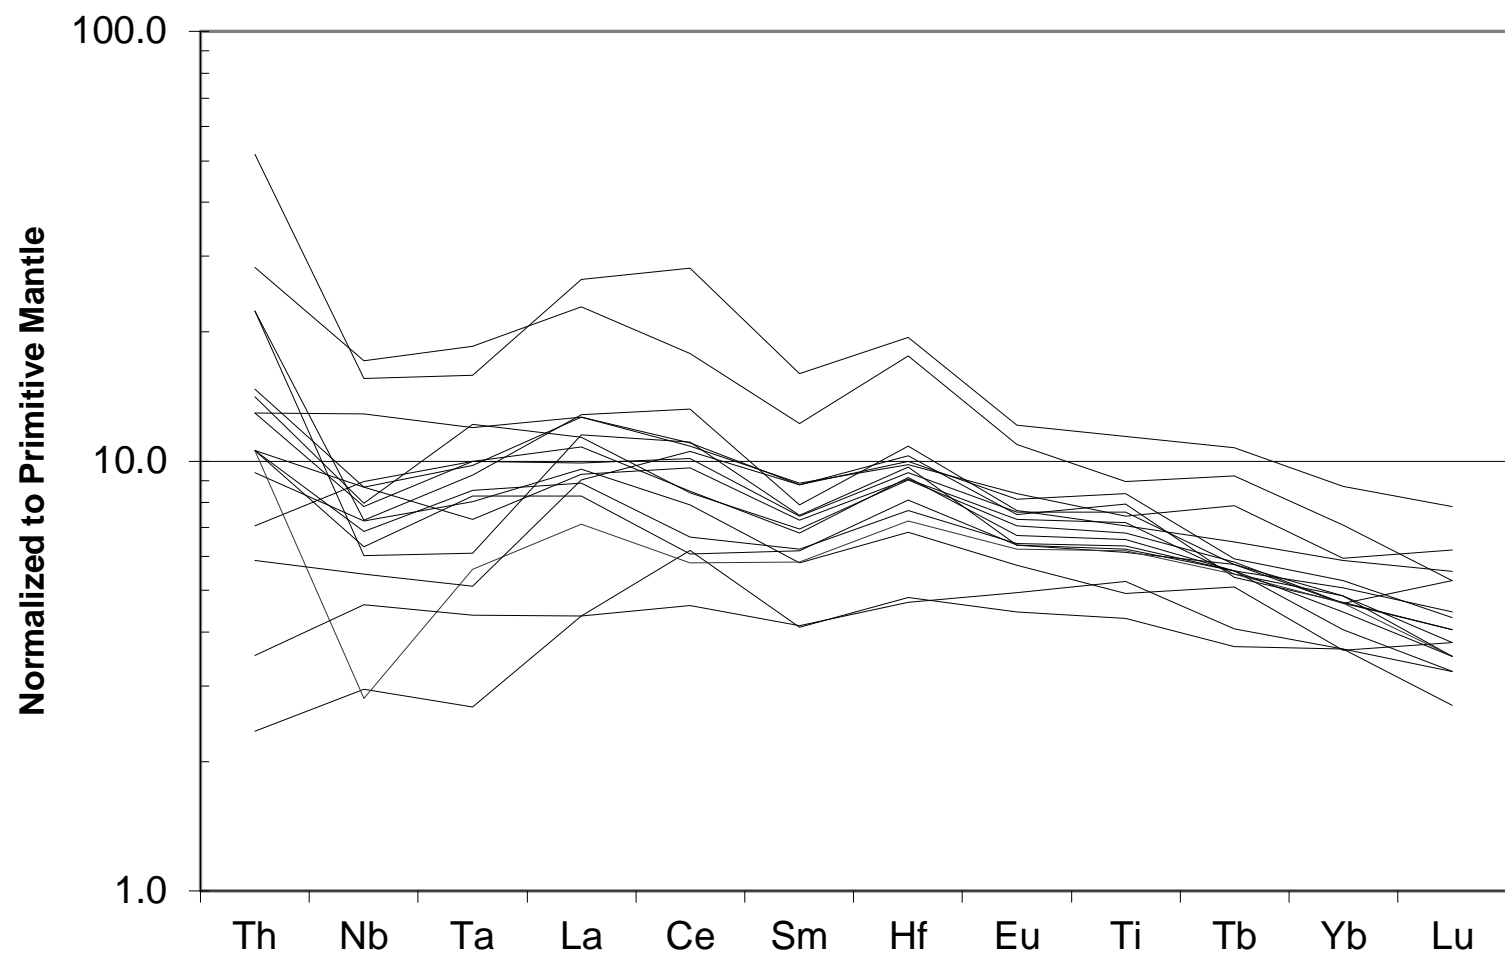

Meijer, Figure DR-2, .xcl

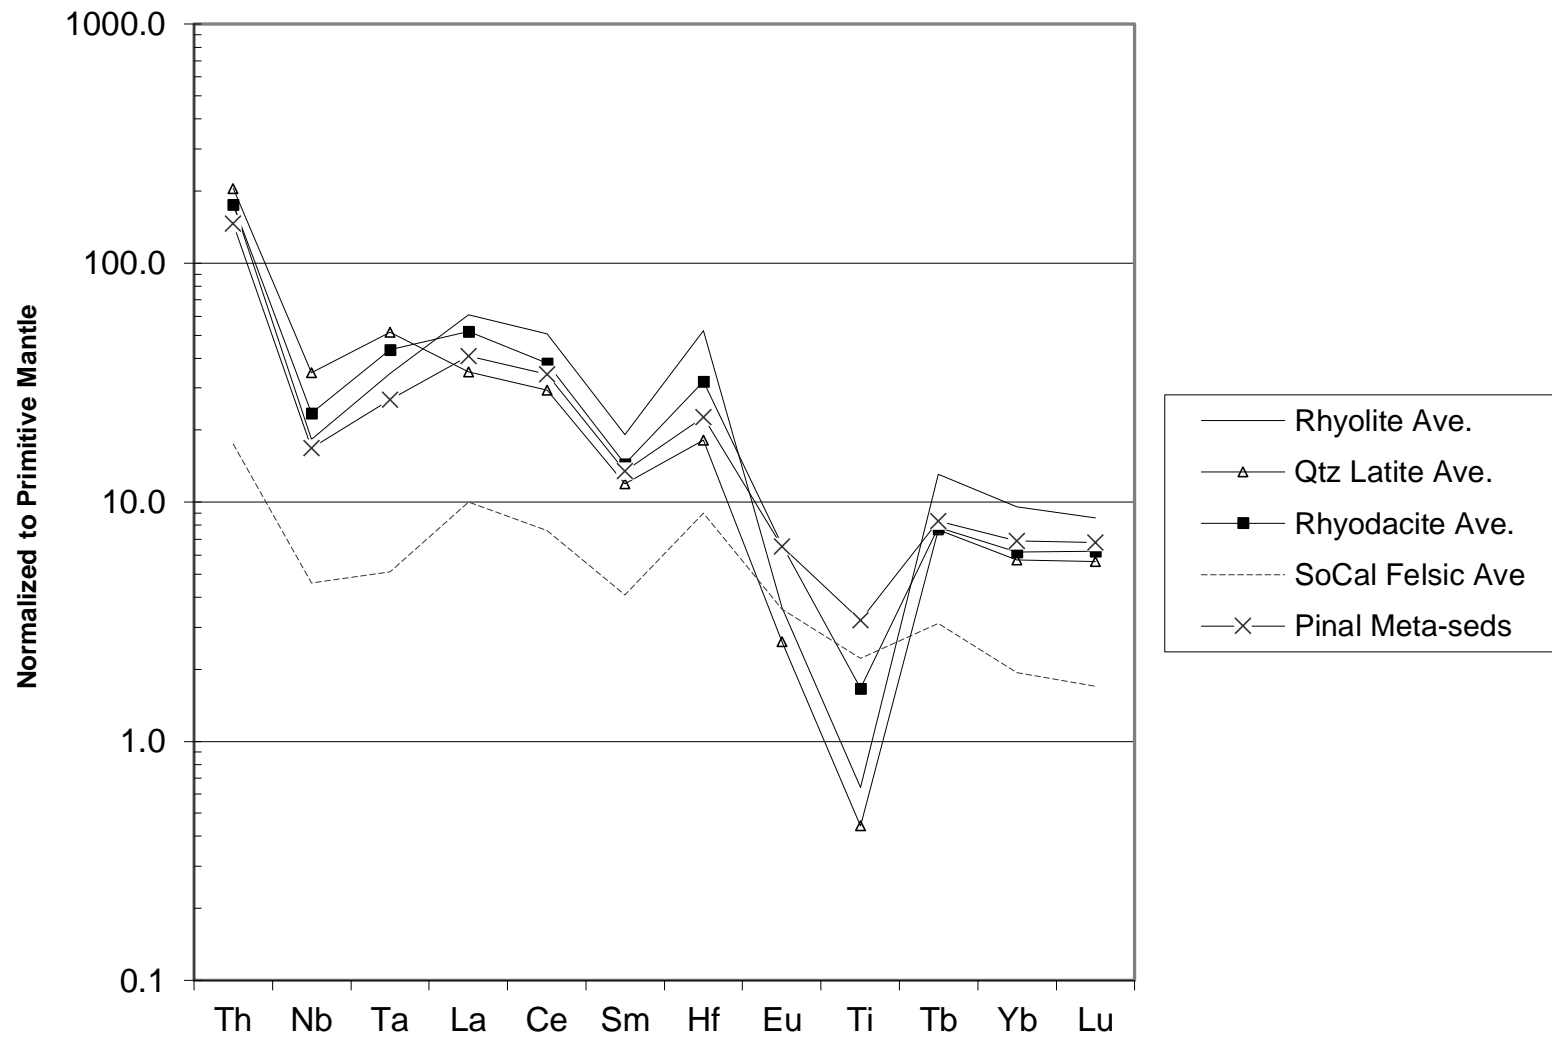

Meijer, Figure DR-3, .xcl

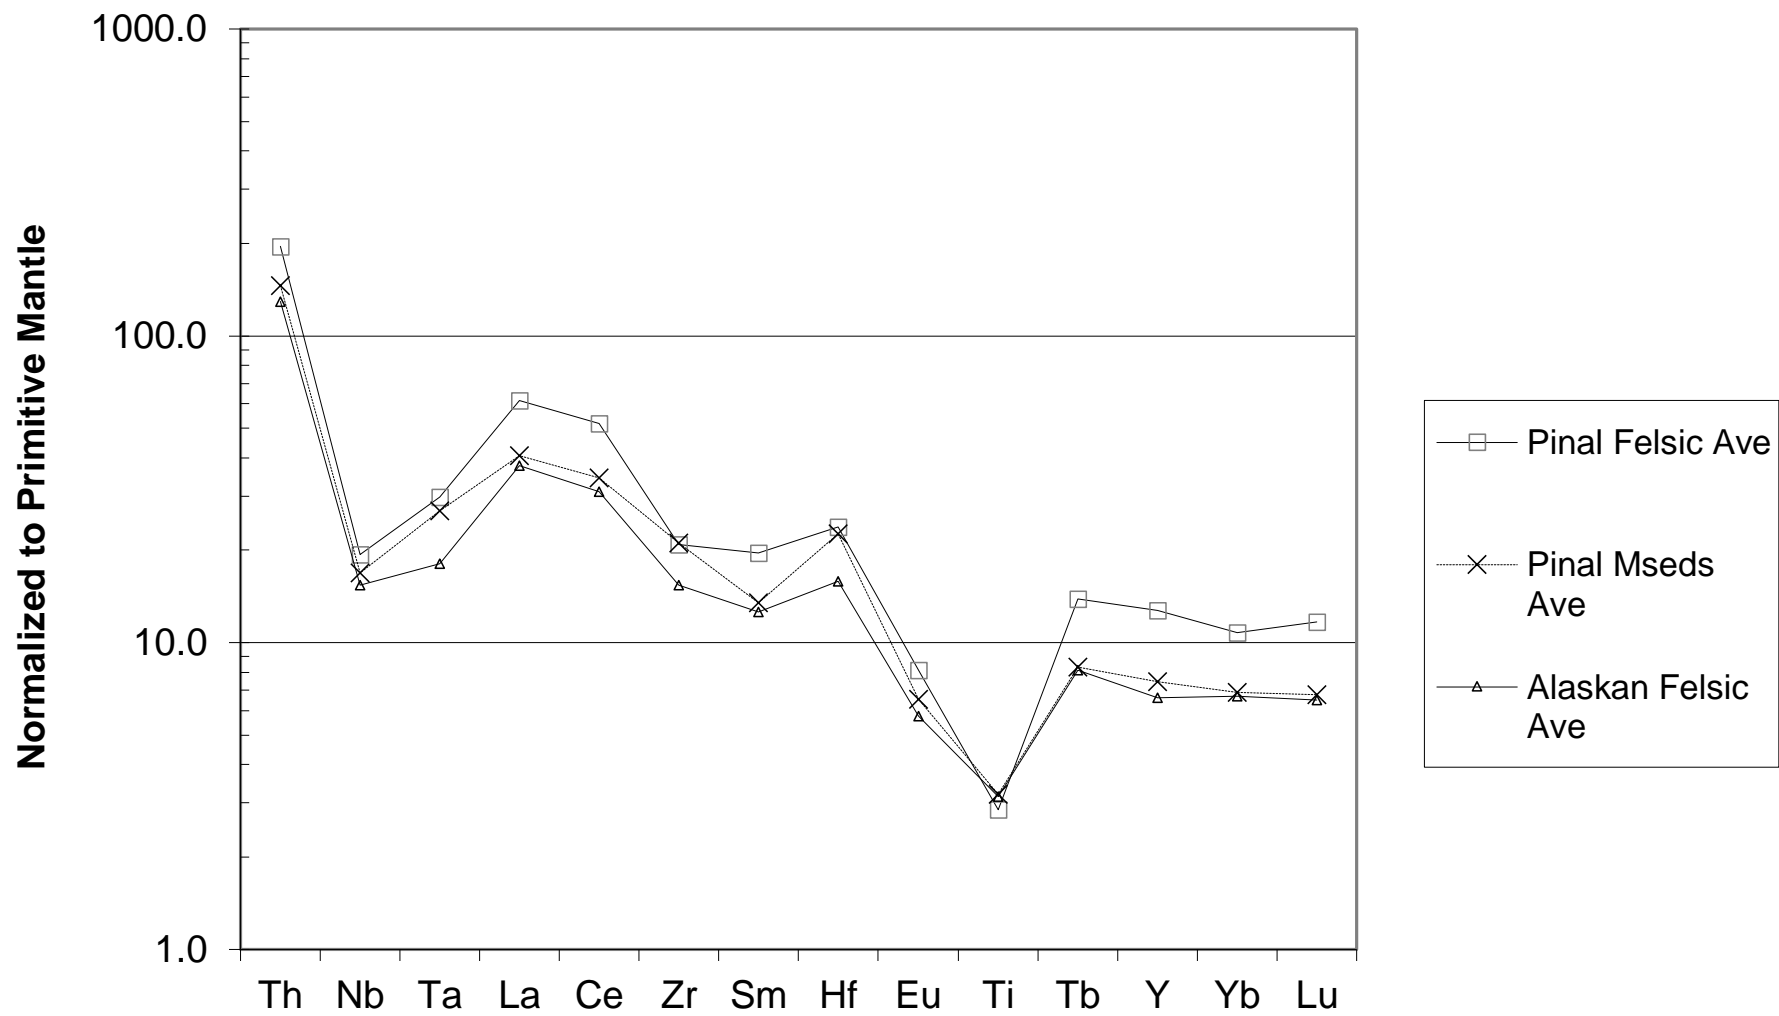



High-Grade Metamorphic Mineral Occurrences in the Pinal Terrane

| Mineral     | Localities                     | References                                      | Comments               |
|-------------|--------------------------------|-------------------------------------------------|------------------------|
| Garnet      | Maricopa Mountains             | this study                                      | Contact metamorphism?  |
|             | San Tan Mountains              | Ferguson and Skotnicki, 1996; this study        |                        |
|             | Table Top Mountains            | this study                                      |                        |
|             | White Hills                    | this study                                      |                        |
|             | Casa Grande Mountains          | Bergquist and Blacet, 1978; this study          |                        |
|             | Santa Teresa Mountains         | Blacet and Miller, 1978                         |                        |
|             | Mineral Mountains              | Schmidt, 1967; this study                       |                        |
|             | Peralta Trail Area             | Ferguson and Skotnicki, 1995; this study        |                        |
|             | Squaw Peak, Phoenix            | Thorpe and Burt, 1980                           |                        |
| Cordierite  | Picketpost Mountain Quadrangle | this study                                      |                        |
|             | White Hills                    | this study                                      |                        |
| Staurolite  | Squaw Peak, Phoenix            | Thorpe and Burt, 1980                           | Contact metamorphism?  |
|             | Santa Teresa Mountains         | Blacet and Miller, 1978                         |                        |
|             | Gila Bend Mountains            | Gilbert, 1991; Gilbert et al., 1992; this study |                        |
|             | "Salt River area"              | Williams, 1991                                  |                        |
| Kyanite     | McDowell Mountains             | Couch, 1981                                     |                        |
|             | Squaw Peak, Phoenix            | Thorpe and Burt, 1980                           |                        |
|             | Miami, Arizona                 | this study                                      |                        |
|             | Dos Cabezas Mountains          | Elevatorski, 1978; this study                   |                        |
| Sillimanite | Superior Quadrangle            | Peterson, 1969                                  | Contact metamorphism?  |
|             | Pinal Mountains                | Keep and Hanson, 1994                           |                        |
|             | Four Peaks area                | Estrada, 1987                                   | Contact metamorphism?  |
|             | McDowell Mountains             | Couch, 1981                                     | Tertiary metamorphism? |
|             | Tortolita Mountains            | Ferguson et al. 2003                            |                        |
|             | Sierra Estrella                | Sommer, 1982                                    |                        |
|             | White Tank Mountains           | Reynolds and DeWitt, 1991                       |                        |
|             | Gila Bend Mountains            | Gilbert. 1991; Gilbert et al., 1992             |                        |

References

Bergquist, J. R., and P. M. Blacet, 1978, Preliminary Reconnaissance Bedrock Geologic Map of Part of the Casa Grande Mountains Quadrangle, Pinal County, Arizona: United States Geological Survey Open-File Report 78-547.

Blacet, P. M., and S. T. Miller, 1978, Reconnaissance Geologic Map of Jackson Mountain Quadrangle, Graham County, Arizona: United States Geological Survey Miscellaneous Field Studies Map MF-939.

Couch, N. P., 1981, Metamorphism and reconnaissance geology of the eastern McDowell Mountains, Maricopa County, Arizona: M.S. Thesis, Arizona State University, Tempe, AZ, 57 p.

Elevatorski, E. A., 1978, Arizona Industrial Minerals, Arizona Department of Mines and Minerals Report no. 2, 19p., Phoenix, Arizona.

Estrada, J. J., ms, 1987, Geology of the Four Peaks area: M. S. Thesis, Arizona State University, Phoenix, Arizona, 76 p.

Ferguson, C. A., Skotnicki, S. J., 1996, Bedrock geology of the San Tan Mountains, Pinal and maricopa Counties, Arizona: Arizona Geological Survey Open-file report 96-9, Tucson, Arizona.

Ferguson, C. A., Skotnicki, S. J., 1995, Geologic map of the Goldfield Quadrangle and the northern part of the Superstition Mts. SW Quadrangles, Maricopa and Pinal Counties, Arizona: Arizona Geological Survey Open-file report 95-9, Tucson, Arizona

Couch, N. P., 1981, Metamorphism and reconnaissance geology of the eastern McDowell Mountains, Maricopa County, Arizona: M.S. Thesis, Arizona State University, Tempe, AZ, 57 p.

Elevatorski, E. A., 1978, Arizona Industrial Minerals, Arizona Department of Mines and Minerals Report no. 2, 19p., Phoenix, Arizona.

Estrada, J. J., ms, 1987, Geology of the Four Peaks area: M. S. Thesis, Arizona State University, Phoenix, Arizona, 76 p.

Ferguson, C. A., Skotnicki, S. J., 1996, Bedrock geology of the San Tan Mountains, Pinal and maricopa Counties, Arizona: Arizona Geological Survey Open-file report 96-9, Tucson, Arizona.

Ferguson, C. A., Skotnicki, S. J., 1995, Geologic map of the Goldfield Quadrangle and the northern part of the Superstition Mts. SW Quadrangles, Maricopa and Pinal Counties, Arizona: Arizona Geological Survey Open-file report 95-9, Tucson, Arizona

Ferguson, C. A., et al.; 2003, Geologic map of the Tortolita Mountains, Pinal and Pima Counties, Arizona: Arizona Geological Survey Digital Geologic Map 26, 1 CD-ROM (46 pp., 2 sheets, scale 1:24,000), Tucson, Arizona.

Gilbert, W. G., 1991, Bedrock geology of the eastern Gila Bend Mountains, Maricopa County, Arizona, Arizona Geological Survey Open-File Report 91-5, Tucson, Arizona.

Gilbert, W. G., Laux, D. P., Spencer, J. E., and Richard, S. M., 1992, Geologic map of the western Gila Bend and southern Eagletail Mountains, Maricopa and Yuma Counties, Arizona, Arizona Geological Survey Open-File Report 92-5, Tucson, Arizona.

Keep, M., and Hansen, V. L., 1994, Deformational styles in the Proterozoic Pinal Schist, Arizona: Microstructural and quartz c-axis analysis: Journal of Geology, v. 102, p. 229-241.

Peterson, D. W., 1969, Geologic Map of the Superior Quadrangle, Pinal County, Arizona, U. S. Geol. Surv. Quadrangle Map GQ-818.

Reynolds, S. J., and DeWitt, E., 1991, Proterozoic geology of the Phoenix region, central Arizona: *in* Karlstrom, K. E., editor, Proterozoic geology and ore deposits of Arizona: Arizona Geological Society Digest 19, Tucson, Arizona, p. 237-250.

Schmidt, E. A., 1967, Geology of the Mineral Mountain Quadrangle, Pinal County, Arizona, M. S. Thesis, University of Arizona, Tucson, AZ, 120 p.

Sommer, J. V., 1982, Structural geology and metamorphic petrology of the northern Sierra Estrella, Maricopa County, Arizona: MS. Thesis, Arizona State University, Tempe, AZ, 127 p.

UTM (Universal Transverse Mercator grid) Coordinates of samples listed in Table 1  
Referenced to North America Datum of 1983 (NAD 1983)

| Sample # | Northing | Easting |
|----------|----------|---------|
| Cg-1     | 3633115  | 432109  |
| Ja-1     | 3627911  | 370724  |
| Jb-2     | 3568263  | 320011  |
| Jw-9     | 3636097  | 513848  |
| Ld-1     | 3554727  | 583837  |
| Mi-9     | 3672652  | 478038  |
| Mm-1     | 3640300  | 371797  |
| Mo-1     | 3624300  | 241950  |
| Ns-1     | 3634538  | 490905  |
| Pk-13    | 3689220  | 487621  |
| Pm-1     | 3681329  | 508835  |
| Po-4     | 3616158  | 604420  |
| Pt-5     | 3692125  | 463600  |
| Sn-2     | 3665677  | 444399  |
| Tm-1     | 3608400  | 493232  |
| Wh-3     | 3628146  | 375917  |
| Zw-19    | 3629173  | 543886  |
